# Supplementary material for: A novel electrochemical biosensor based on WO3@AuNPs and HBP@BIBB macromolecule-triggered ATRP for DR1 detection
Source: Royal Society of Chemistry journal article supplement (doi:10.1039/d4nj01098a), 2024-01-01
Supplement: d4nj01098a1.pdf [file d4nj01098a1.pdf]

## Supporting information

### **A novel electrochemical biosensor based on WO<sub>3</sub>@AuNPs and HBP@BIBB macromolecular-triggered ATRP for DR1 detection**

Xiaojing Cui<sup>a</sup>, Yaping Zhang<sup>a</sup>, Hanmeng Zhang<sup>a</sup>, Huaixia Yang<sup>\*a</sup>, Yanju Liu<sup>\*a</sup>,  
Fuchun Si<sup>\*b</sup>

<sup>a</sup> *Pharmacy College, Henan University of Chinese Medicine, Zhengzhou 450046,  
People's Republic of China*

<sup>b</sup> *Henan Key Laboratory of TCM Syndrome and Prescription Signaling, Henan  
International Joint Laboratory of TCM Syndrome and Prescription Signaling,  
Academy of Chinese Medical Sciences, Henan University of Chinese Medicine,  
Zhengzhou, 450046, PR China*

#### 1. The AFM characterization of the sensor

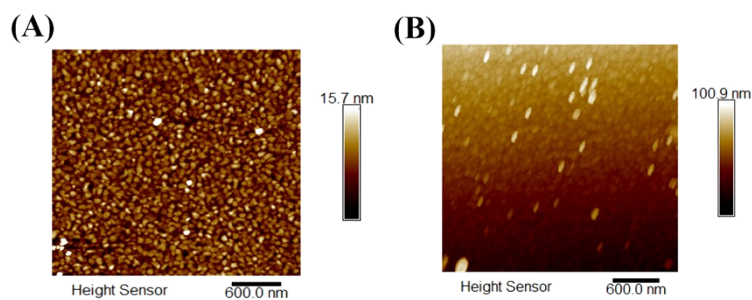

**Fig. S1** The AFM images of the bare electrode (A) and the electrode after polymerization (B).
